# Supplementary material for: How the Presence of Crystalline Phase Affects Structural Relaxation in Molecular Liquids: The Case of Amorphous Indomethacin
Source: MDPI journal article supplement (doi:10.3390/ijms242216275), 2023-11-13
Supplement: s1 [file s1]

## Supplementary Materials

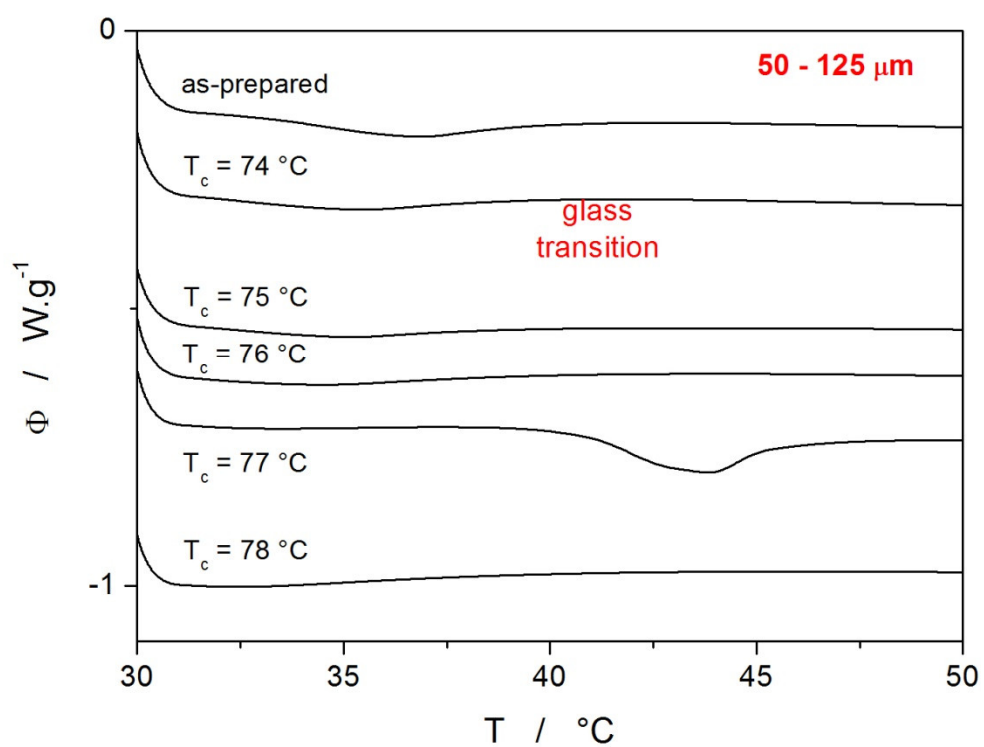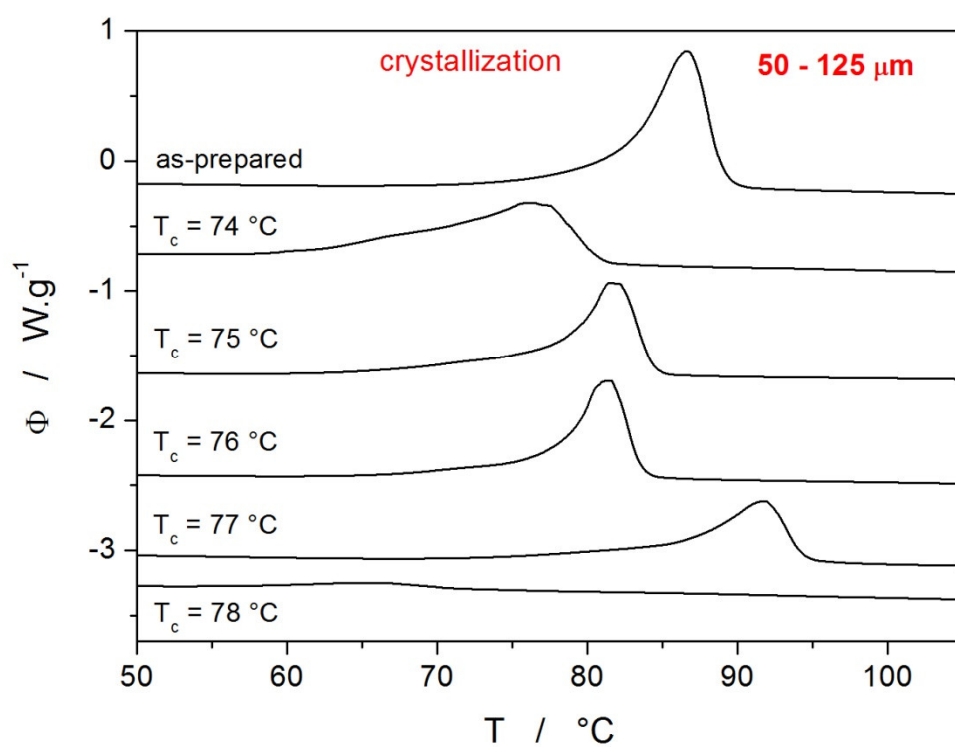

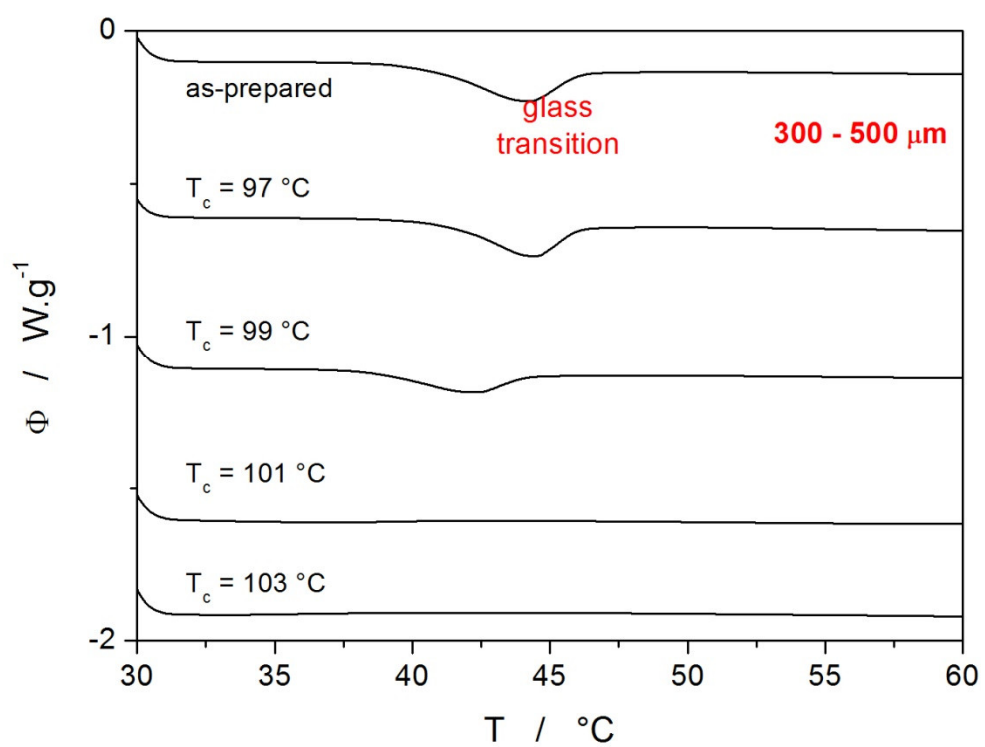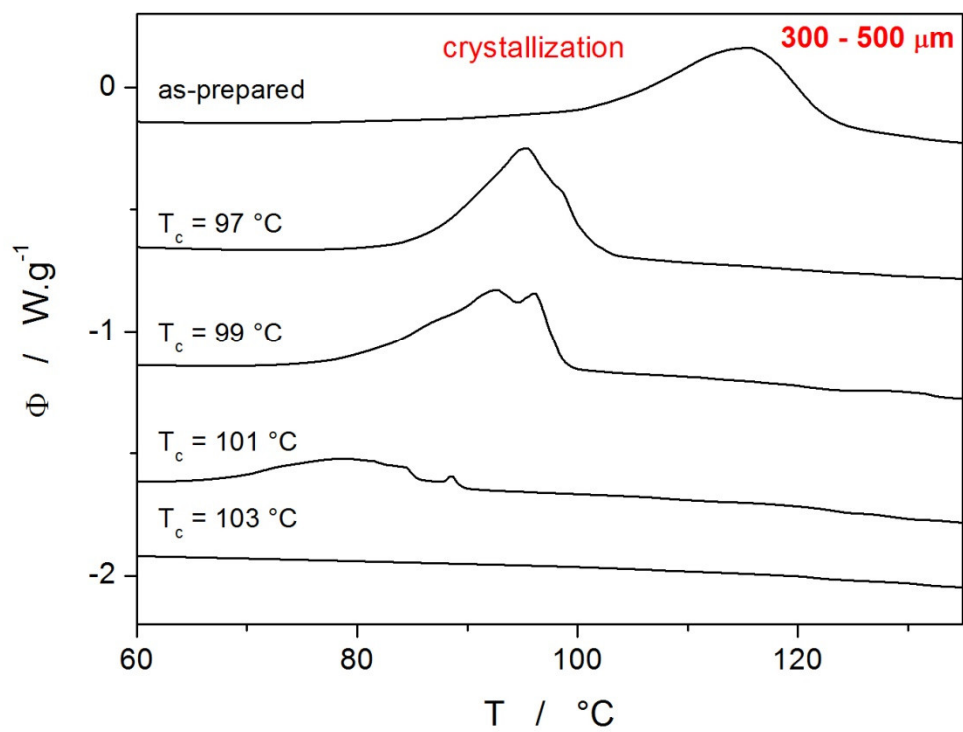

**Figure S1.** Zoomed in glass transition and crystallization regions from Figure 2.

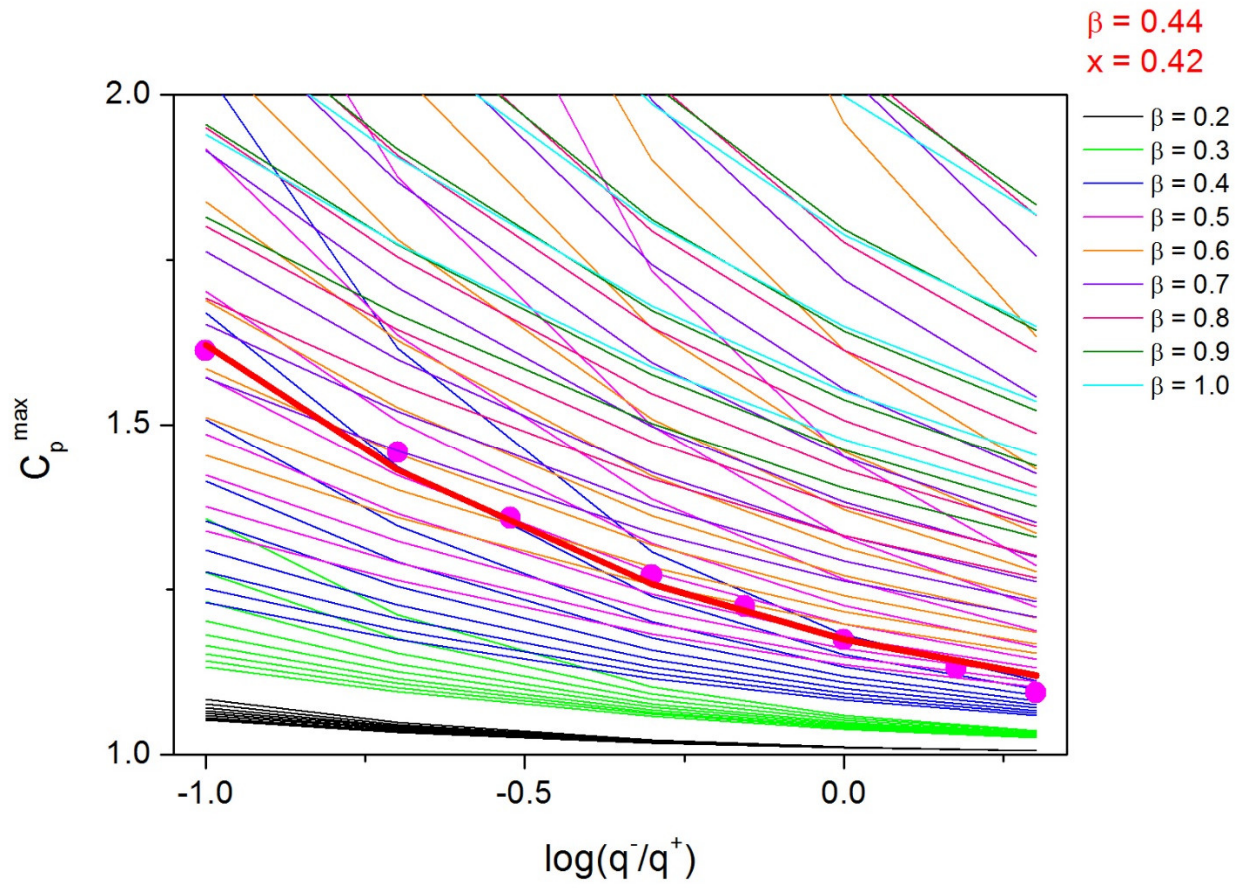

**Figure S2.** A colored version of Figure 7C. Particular colors correspond to the groups of dependences with similar  $\beta$  value. In each such group, the increasing value of  $x$  corresponds to the decrease of  $C_p^{\max}$ .
